# Supplementary material
Source: publisher figshare collection journal article supplement (https://acs.figshare.com/ndownloader/files/8932951)
Supplement: Supplementary file 1 [file 8932951]

## Support Information

# High-pressure thermal decomposition of tetrahydrotricyclopentadiene (THTCPD) and binary high-density hydrocarbon fuels of JP-10/THTCPD in tubular flowing reactor

Xueke Jia<sup>a†</sup>, Baoman Guo<sup>a†</sup>, Baitang Jin<sup>a</sup>, Xiangwen Zhang<sup>a,b</sup>, Kai Jing<sup>a</sup>,  
Guozhu Liu<sup>a,b\*</sup>

(a. Key Laboratory for Green Chemical Technology of Ministry of Education, School of Chemical Engineering and Technology, Tianjin University, Tianjin 300072, China;

b. Collaborative Innovation Center of Chemical Science and Engineering (Tianjin),  
Tianjin University, Tianjin 300072, China)

[<sup>†</sup>]These authors contributed equally to this work and should be considered as co-first authors.

\*Telephone/Fax: +86-22-85356099. E-mail: gliu@tju.edu.cn.

High-pressure thermal decomposition of THTCPD and binary high-density hydrocarbon fuels of JP-10/THTCPD were investigated at 500-660 °C and 4.0 MPa in an electrically heated tubular reactor. The overall component distribution (wt%) of liquid residuals from thermal decomposition of THTCPD, 30% JP-10/70% THTCPD and 50% JP-10/50% THTCPD are shown in **Table S1**. Due to the complex structures of both the THTCPD and their isomers were quite complex, the structures of THTCPD and their isomers were shown in **Figure S1**. In addition, conversion of JP-10 in JP-10/THTCPD mixtures were listed in **Figure S2**.

## Table Captions

**Table S1** The component distribution (wt%) of liquid residuals from thermal decomposition of THTCPD and 30% JP-10/70% THTCPD and 50% JP-10/50% THTCPD (60 g/min, 4 MPa)

**Table S1** The component distribution (wt%) of liquid residuals from thermal decomposition of  
THTCPD and 30% JP-10/70% THTCPD and 50% JP-10/50% THTCPD (60 g/min, 4 MPa)

| Number | Component                    | Structure                                                                           | THTCPD | 30% JP-10/70% | 50% JP-10/50% |
|--------|------------------------------|-------------------------------------------------------------------------------------|--------|---------------|---------------|
|        |                              |                                                                                     |        | THTCPD        | THTCPD        |
| 1      | 1,3-pentadiene               | 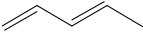   |        |               | 0.0991        |
| 2      | 1,3-cyclopentadiene          |    | 1.5446 | 1.5082        | 2.0227        |
| 3      | cyclopentene                 |    | 3.3112 | 3.2158        | 3.9455        |
| 4      | cyclopentane                 |    | 1.5867 | 1.6131        | 1.8763        |
| 5      | 5-methyl-1,3-cyclopentadiene |    | 0.1180 | 0.1200        | 0.1360        |
| 6      | 1-methylcyclopentene         |    | 0.3232 | 0.2911        | 0.2965        |
| 7      | benzene                      |  | 1.0069 | 1.0981        | 1.3657        |
| 8      | 1-methyl-1,3-cyclopentadiene |  | 0.1330 | 0.1436        | 0.1728        |
| 9      | 1-ethylcyclopentene          |  | 0.2801 |               |               |
| 10     | toluene                      |  | 0.6201 | 0.7248        | 0.8587        |
| 11     | C8                           |                                                                                     | 0.2819 |               |               |
| 12     | dicyclopentadiene            |  | 0.7025 | 0.7843        | 0.7693        |
| 13     | indane                       |  | 0.3307 | 0.3383        | 0.2974        |

|    |                                           |                                                                                     |        |         |         |
|----|-------------------------------------------|-------------------------------------------------------------------------------------|--------|---------|---------|
| 14 | indene                                    | 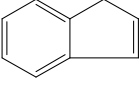   | 0.3363 | 0.3430  | 0.3088  |
| 15 | 3a,4,5,6,7,7a-hexahydro-4,7-methanoindene |    | 1.1568 | 1.0159  | 0.8526  |
| 16 | JP-10                                     |    | 1.0342 | 29.0744 | 41.5249 |
| 17 | 3-cyclopentylcyclopentene                 |    | 0.2707 | 0.7220  | 0.7324  |
| 18 | endo-THTCPD                               |    |        |         | 0.2403  |
| 19 | 2,3-dihydro-4-methyl-1H-indene            |    | 0.3653 |         |         |
| 20 | 3-methyl-1H-indene                        |   | 0.0824 |         |         |
| 21 | naphthalene                               |  | 0.2201 |         |         |
| 22 | 1-ethynyladamantane                       |  | 0.1705 |         |         |

---

## Figure Captions

**Figure S1** The structures of THTCPD and their isomers

**Figure S2** Conversion of JP-10 in JP-10/THTCPD mixtures

(■ THTCPD, ● 30% JP-10/70% THTCPD, ▲ 50% JP-10/50% THTCPD; 4MPa)

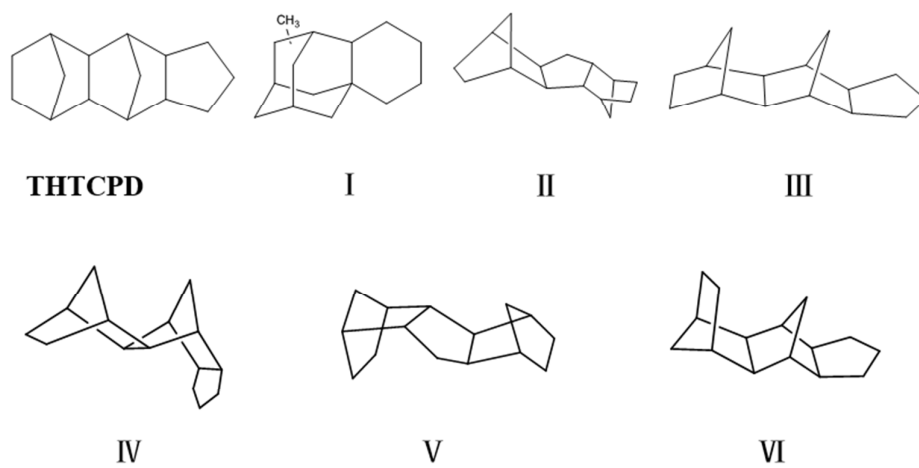

**Figure S1** The structures of THTCPD and their isomers

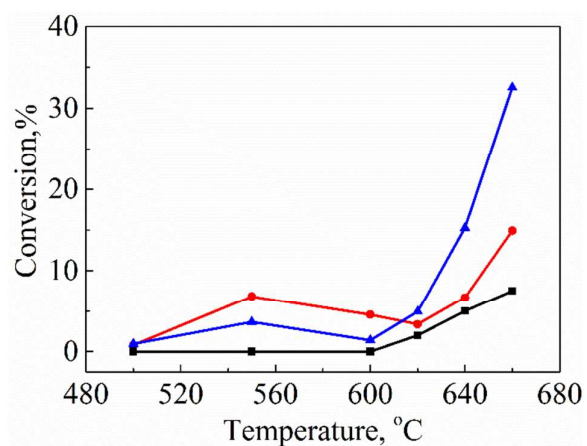

**Figure S2** Conversion of JP-10 in JP-10/THTCPD mixtures  
 (■ THTCPD, ● 30% JP-10/70% THTCPD, ▲ 50% JP-10/50% THTCPD; 4MPa)

The initial pathway of THTCPD pyrolysis will generate a portion of JP-10 by intermolecular C-C bond breakage. As a result, JP-10 in JP-10/THTCPD mixtures not only acted as reactants but also as products during the pyrolysis.
